# Supplementary material for: In Vitro Effect of Enzymes and Human Milk Oligosaccharides on FODMAP Digestion and Fecal Microbiota Composition
Source: MDPI journal article supplement (doi:10.3390/nu15071637), 2023-03-28
Supplement: s1 [file s1]

Supplementary Materials

# **In Vitro Effect of Enzymes and Human Milk Oligosaccharides on FODMAP Digestion and Fecal Microbiota Composition**

Van T. Pham, Robert E. Steinert, Cindy Duysburgh, Jonas Ghyselinck, Massimo Marzorati

and Peter J. T. Dekker

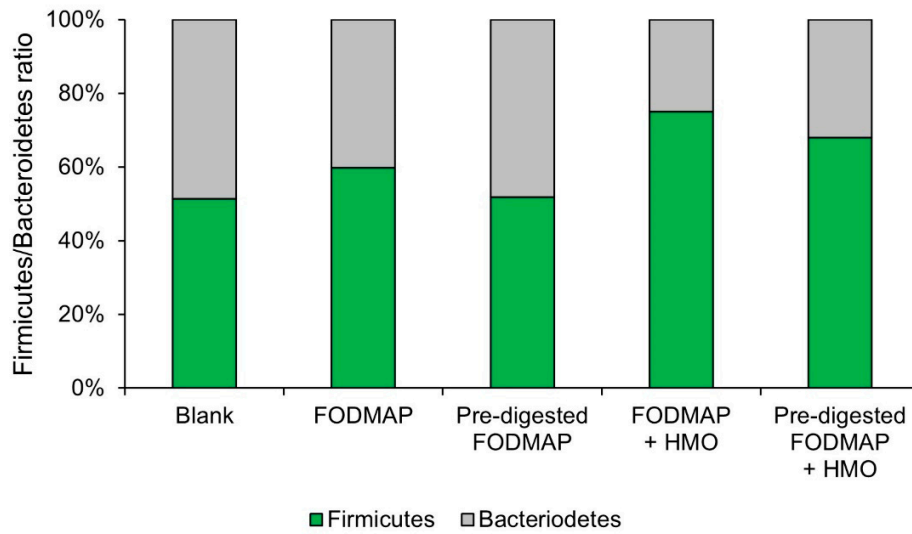

**Figure S1.** Firmicutes/Bacteroidetes ratio in short-term colonic batch experiments (48 hours).

The test substrates were as follows: FODMAP (0.86 g/L FOS + 0.21 g/L stachyose + 0.21 g/L raffinose + 1.71 g/L lactose), pre-digested FODMAP (0.05 g/L stachyose + 0.10 g/L raffinose + 0.11 g/L lactose), FODMAP + HMO (FODMAP composition + 2.4 g/L 2'FL/DFL + 0.6 g/L lacto-N-neotetraose), pre-digested FODMAP + HMO (pre-digested FODMAP composition + 2.4 g/L 2'FL/DFL + 0.6 g/L lacto-N-neotetraose). Different letters represent statistically significant differences between the different test conditions ( $p < 0.05$ ). 2'FL = 2'fucosyllactose; DFL = difucosyllactose; FODMAP = fermentable oligosaccharides, disaccharides, monosaccharides and polyols; HMO = human milk oligosaccharide.

(a)

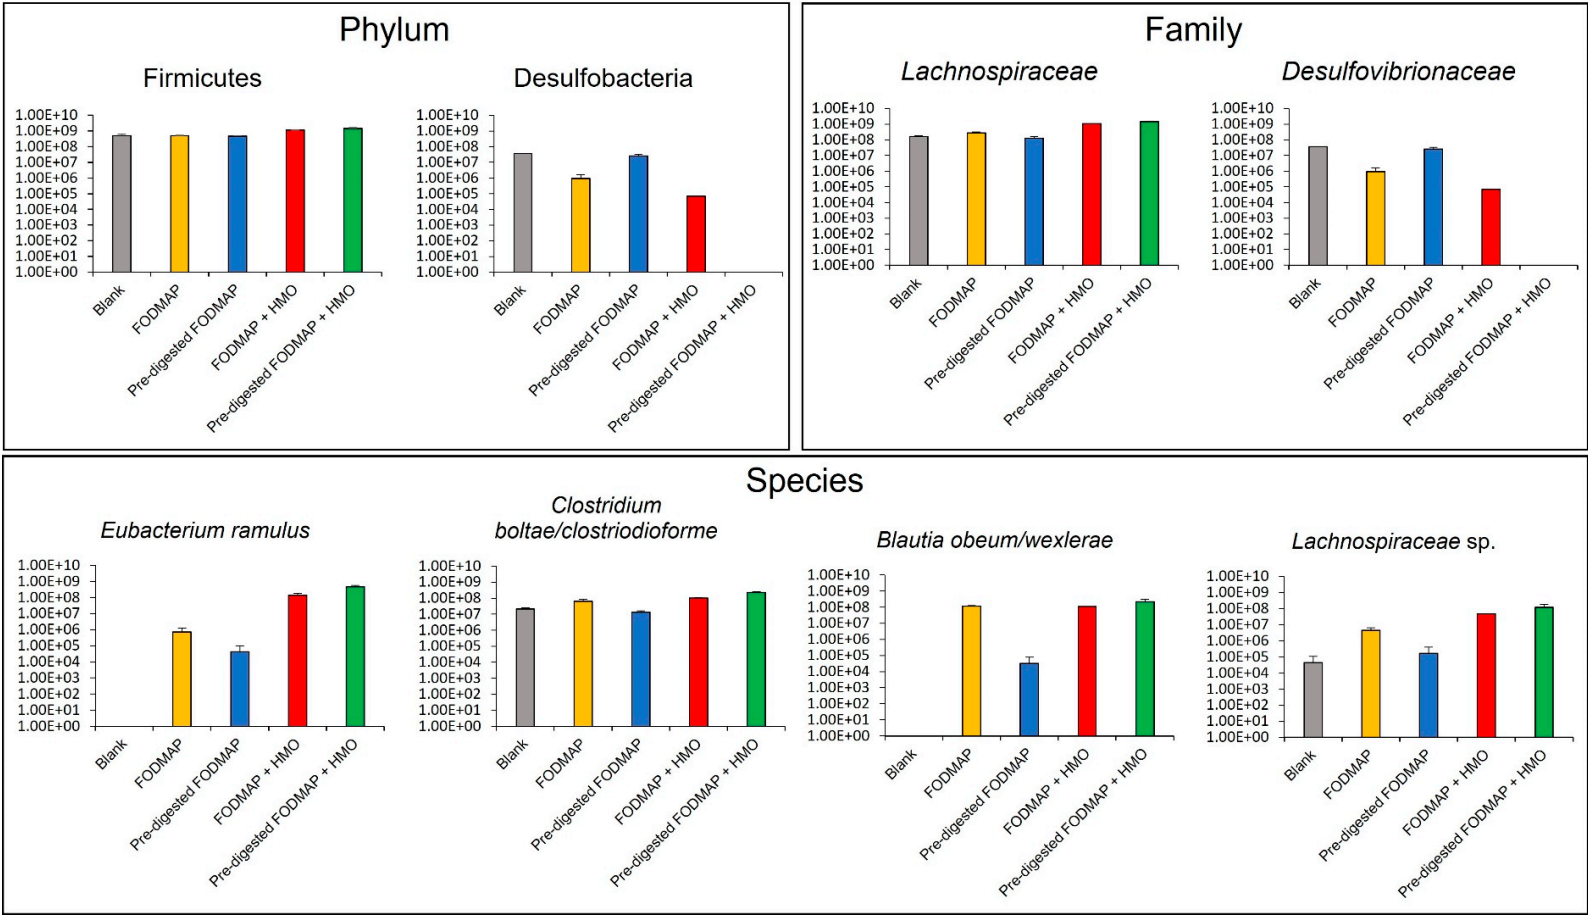

(b)

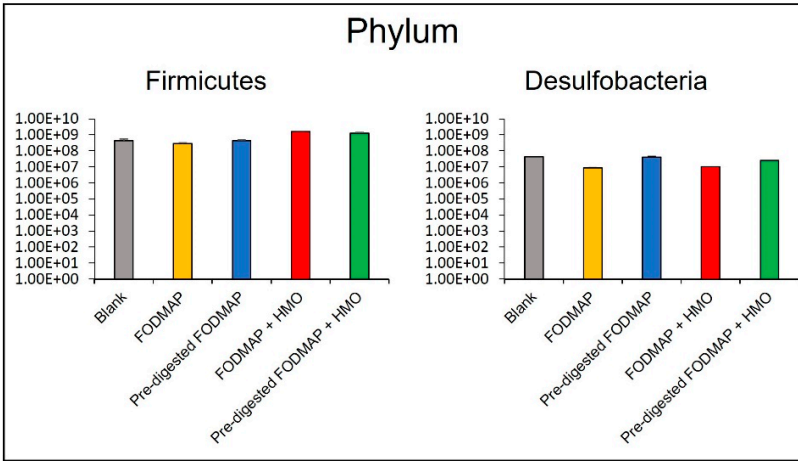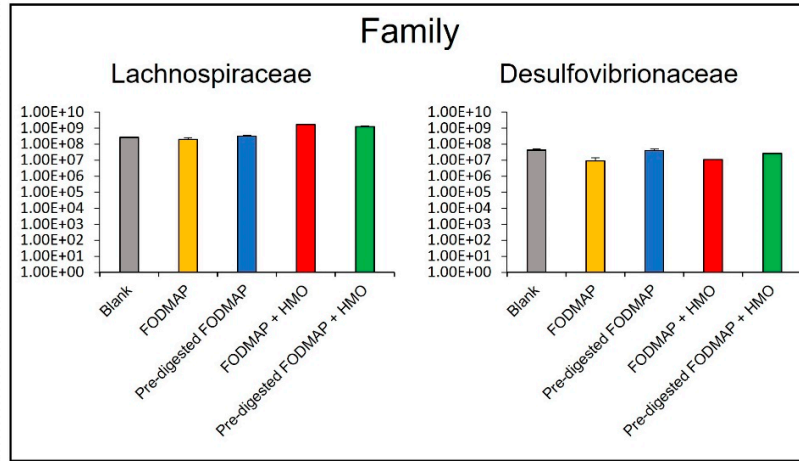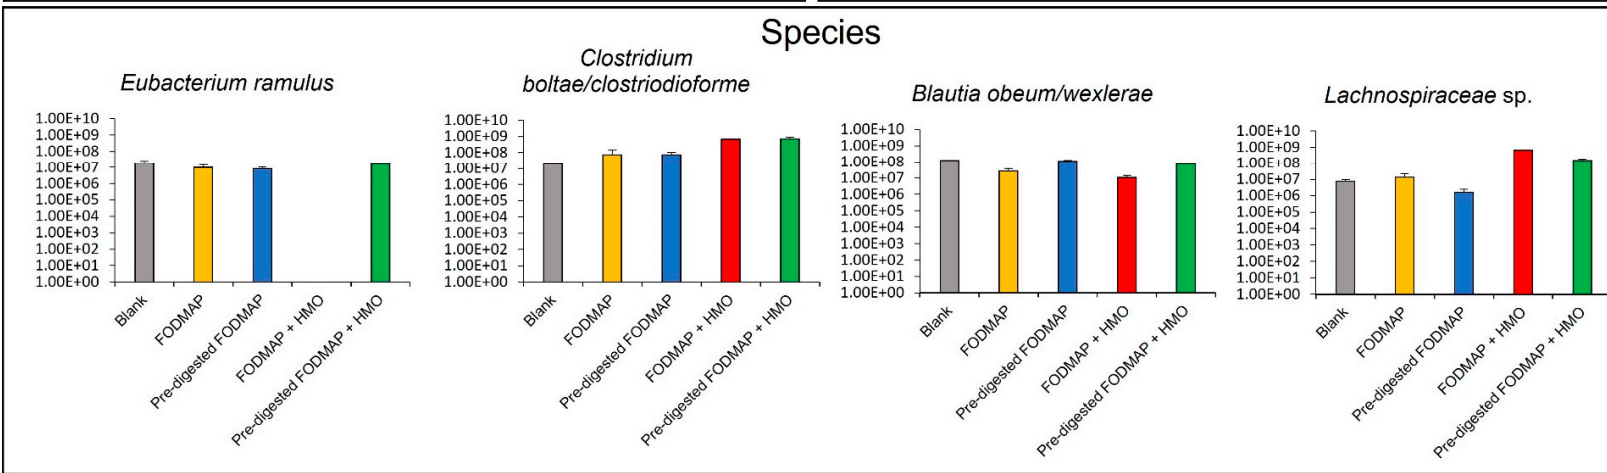

**Figure S2.** Absolute abundance at the phylum, family, and species level for donor 3 **(a)** and donor 4 **(b)**. FODMAP = fermentable oligosaccharides, disaccharides, monosaccharides and polyols; HMO = human milk oligosaccharide.

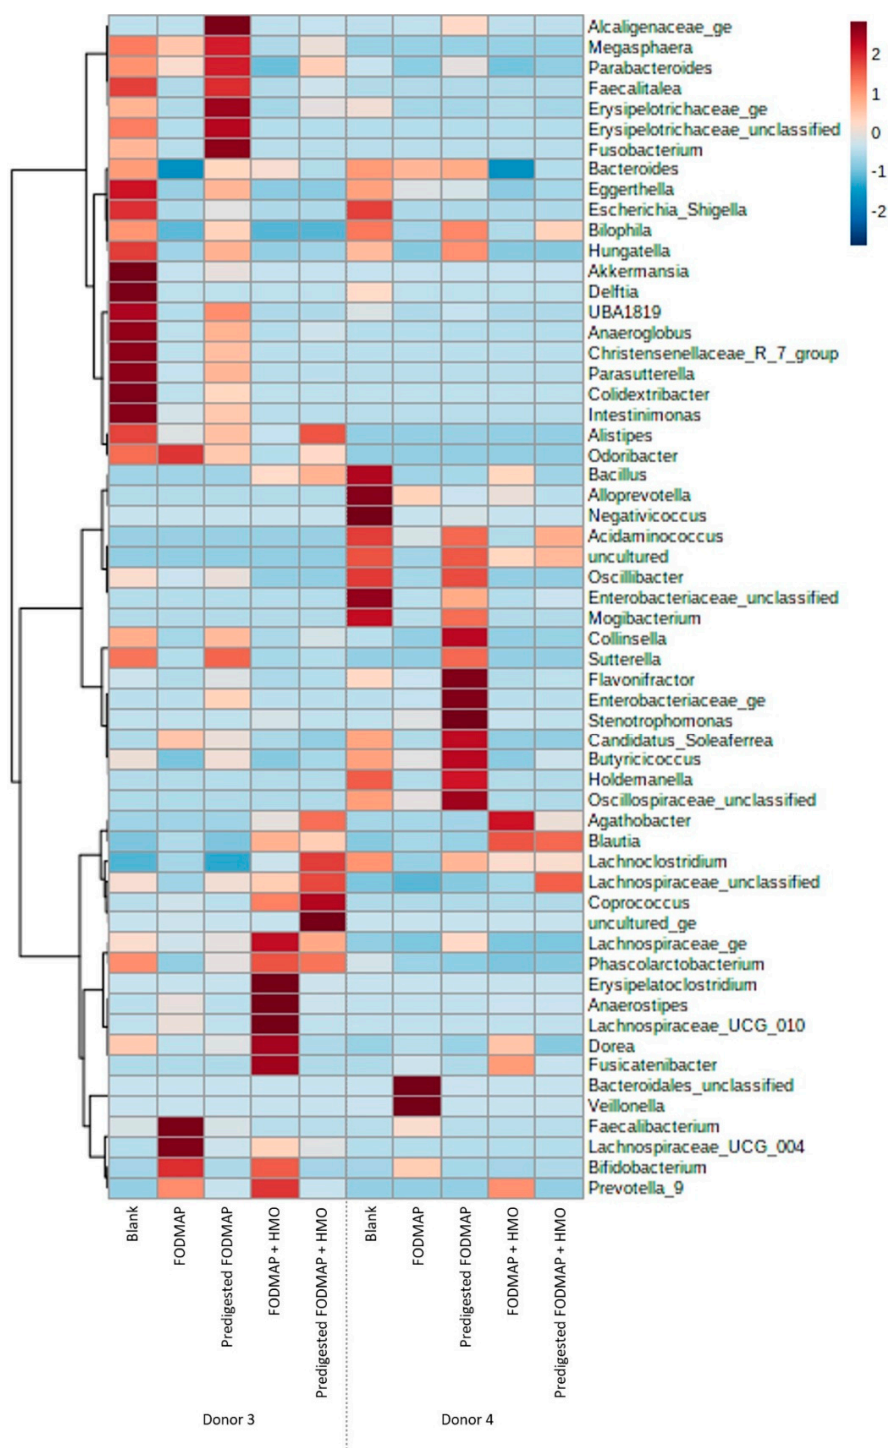

**Figure S3.** Heatmap of the microbial community composition on day 9/10 according to donor at the genus level in the QuintSHIME® model. TC samples collected on day 9 and day 10 were considered replicates. FODMAP = fermentable oligosaccharides, disaccharides, monosaccharides and polyols; HMO = human milk oligosaccharide; SHIME = simulator of the human intestinal microbial ecosystem; TC = transverse colon.
